# Supplementary material for: Prevalence and Risk Factors of Brain Infarcts and Associations With Cognitive Performance in Tenants of Marginal Housing
Source: PubMed Central journal article supplement — J Am Heart Assoc. 2019 Jun 27;8(13):e011412. doi: 10.1161/JAHA.118.011412 (PMC6662377; doi:10.1161/jaha.118.011412), 2019-06-27
Supplement: JAH3-8-e011412a-s001.pdf [file JAH3-8-e011412a-s001.pdf]

# **SUPPLEMENTAL MATERIAL**

## **Data S1.**

### **SUPPLEMENTAL METHODS**

**Modified Charlson Score Generation:** A modified Charlson Comorbidity Index (CCI) score was calculated based on results from medical history questionnaire. Because the comorbidities included in the self-report questionnaire used did not correspond exactly to Charlson's original definitions, some conditions were excluded (Congestive heart failure, peripheral vascular disease, hemiplegia, connective tissue disease and diabetes with end organ damage). For conditions where severity variables were not available (peptic ulcer disease, moderate to severe liver disease), low and high estimates of the Charlson index for each patient was computed by weighing each answer for conditions with the lowest and highest possible Charlson weight. A previous study using this method showed no difference in mortality outcomes between the high and low estimates so the high estimates were used here.<sup>1</sup> The score was further modified to remove points given for previous strokes to allow for further analysis to generate a modified CCI used for analysis to adjust for co-morbidity.

**Table S1. Neuroimaging protocol.**

|                   | ACQ<br>Matrix | FOV              | REC<br>Matrix | REC<br>Voxel<br>(mm) | slices | slice<br>thickness<br>(mm) | gap<br>(mm) | TR<br>(ms) | TE<br>(ms) | SENSE | Coil             | Flip<br>Angle | TI<br>(ms) |
|-------------------|---------------|------------------|---------------|----------------------|--------|----------------------------|-------------|------------|------------|-------|------------------|---------------|------------|
| 3D T1<br>Sagittal | 256 x<br>250  | 256 x<br>256     | 256 x<br>256  | 1.0 x<br>1.0         | 190    | 1                          | 0           | 7.6        | 3.5        | YES   | SENSE-<br>Head-8 | 8             | 1051       |
| SWI<br>Axial      | 444 x<br>216  | 200 x<br>151.351 | 512 x<br>512  | 0.39<br>x<br>0.39    | 96     | 2                          | 0           | 30         | 25         | YES   | SENSE-<br>Head-8 | 17            |            |
| FLAIR<br>Axial    | 256 x<br>203  | 240 X<br>191.25  | 512 x<br>512  | 0.47<br>x<br>0.47    | 50     | 3                          | 0           | 11000      | 125        | NO    | SENSE-<br>Head-8 | 90            | 2800       |

**Table S2. Infarct Location.**

| Stroke Location                  | Total | R | L  | Bilateral |
|----------------------------------|-------|---|----|-----------|
| Corona radiata/centrum semiovale | 3     | 2 | 1  | 0         |
| Internal capsule                 | 0     | 0 | 0  | 0         |
| Caudate                          | 7     | 3 | 4  | 0         |
| Lentiform                        | 1     | 0 | 1  | 0         |
| Thalamus                         | 1     | 0 | 1  | 0         |
| Midbrain                         | 0     | 0 | 0  | 0         |
| Pons                             | 1     | 0 | 1  | 0         |
| Medulla                          | 0     | 0 | 0  | 0         |
| Cerebellum                       | 6     | 2 | 3  | 2         |
| ACA territory embolic            | 1     | 1 | 0  | 0         |
| MCA territory embolic            | 1     | 0 | 1  | 0         |
| PCA territory embolic            | 1     | 0 | 1  | 0         |
| ACA/MCA watershed                | 1     | 0 | 0  | 1         |
| MCA/PCA watershed                | 0     | 0 | 0  | 0         |
| Other or multiple (specify)*     | 2     | 1 | 0  | 0         |
| Total                            | 25    | 9 | 13 | 3         |

\*1: R external capsule and pons; 2: Multiple lacunes in external capsule watershed

region

---

**Table S3. Logistic Regression Model.**

|                             | Beta  | Standard Error | p value | OR    | 95% CI for Beta |       |
|-----------------------------|-------|----------------|---------|-------|-----------------|-------|
|                             |       |                |         |       | Lower           | Upper |
| Age                         | .075  | .026           | .004    | 1.078 | 1.024           | 1.135 |
| Total Homelessness Duration | -.074 | .062           | .234    | .928  | .822            | 1.049 |

**Table S4. Demographics in Vancouver studies of vulnerably-housed and homeless participants.**

| <b>Measure</b>              | <b>HOTEL (2008-2011)<br/>imaging participants<br/>at baseline N=228</b> | <b>Lewis et al.<br/>(2007-2008)<br/>N=628<sup>2</sup></b> | <b>Shannon et al.<br/>(2003-2004) N=1813<sup>3</sup></b> | <b>Palepu et al.<br/>(2009)<br/>N=396<sup>4</sup></b>                                                                 |
|-----------------------------|-------------------------------------------------------------------------|-----------------------------------------------------------|----------------------------------------------------------|-----------------------------------------------------------------------------------------------------------------------|
| Sampling                    | Community-based (all consenting tenants) at SROs                        | Stratified random sample of SROs                          | Facility-based at SROs                                   | Randomly selected participants from 10 SROs (n=199) and homeless participants from shelters and meal programs (n=197) |
| Age (years)                 | 46.4 (mean) SD 9.4                                                      | 46 (mean)                                                 | 42 (median)                                              | 42.0 (mean) SD 10.2                                                                                                   |
| Sex (Male)                  | 176/228 (77%)                                                           | 496/628 (79%)                                             | 1375/1800 (76%)                                          | 244/393 (62%)                                                                                                         |
| White                       | 133/227 (59%)                                                           | 426/628 (68%)                                             |                                                          | 222/383 (58%)                                                                                                         |
| Indigenous                  | 69/227 (30%)                                                            | 105/628 (17%)                                             | 498/1813 (28%)*                                          | 105/383 (27%)                                                                                                         |
| Mixed/Other                 | 25/227 (11%)                                                            | 97/628 (15%)                                              |                                                          | 56/383 (15%)                                                                                                          |
| Average monthly income, CAD | \$800 (median)                                                          | \$1109 (mean)                                             |                                                          | \$1074 (median)                                                                                                       |

|                                               |               |               |                 |               |
|-----------------------------------------------|---------------|---------------|-----------------|---------------|
| Previous history of homelessness              | 165/225 (73%) | 327/628 (52%) | 512/1812 (28%)† |               |
| 0-8 years                                     | 45/228 (20%)  | 69/628 (11%)  |                 |               |
| 8-11 years                                    | 126/228 (55%) | 276/628 (44%) |                 | 178/391 (46%) |
| 12 years                                      | 32/228 (14%)  | 138/628 (22%) |                 | 99/391 (25%)  |
| >12 years                                     | 25/228 (11%)  | 138/628 (22%) |                 | 114/391 (29%) |
| Active Smoker                                 | 213/227 (94%) | 481/628 (77%) |                 |               |
| Injection drug use in past 1-6 months         | 125/228 (55%) |               | 718/1813 (40%)  |               |
| Current alcohol dependence or problematic use | 42/228 (18%)  | 126/628 (20%) |                 | 60/396 (15%)  |
| Positive HIV status                           | 39/228 (17%)  |               | 462/1813 (26%)  |               |
| Previous HCV infection                        | 150/228 (66%) |               | 868/1813 (48%)  |               |

\*Indigenous versus non-Indigenous reported only

**Table S5. Demographics in Cross-Canada studies of vulnerably-housed and homeless participants.**

| Measure     | HOTEL imaging<br>participants at baseline<br>(2008-2011) | Health and Housing in Transition Study (2009) <sup>4,5</sup>                                                                                                                                                                                    |                        |                       |                        |
|-------------|----------------------------------------------------------|-------------------------------------------------------------------------------------------------------------------------------------------------------------------------------------------------------------------------------------------------|------------------------|-----------------------|------------------------|
|             |                                                          | Vancouver, Toronto,<br>Ottawa<br>N=1192                                                                                                                                                                                                         | Vancouver<br>N=396     | Toronto<br>N=399      | Ottawa<br>N=396        |
|             | N=228                                                    |                                                                                                                                                                                                                                                 |                        |                       |                        |
| Sampling    | Community-based (all<br>consenting tenants) at SROs      | Randomly selected participants from 10 SROs or rooming houses (due to difficulties<br>with access, modified to include meal programs, community health centres, drop-in<br>centres); for homeless, randomly selected shelters and meal programs |                        |                       |                        |
| Age (years) | 46.4 (mean)<br>SD 9.4                                    | (values presented as<br>groups rather than<br>mean)                                                                                                                                                                                             | 42.0 (mean)<br>SD 10.2 | 43.5 (mean)<br>SD 9.9 | 41.1 (mean)<br>SD 11.4 |
| Sex (Male)  | 176/228<br>(77%)                                         | 781/1188<br>(66%)                                                                                                                                                                                                                               | 244/393<br>(62%)       | 258/399<br>(65%)      | 278/395<br>(70%)       |
| White       | 133/227                                                  | 722/1156                                                                                                                                                                                                                                        | 222/383                | 203/379               | 297/393                |



|                                        |                  |                     |                  |                  |                  |
|----------------------------------------|------------------|---------------------|------------------|------------------|------------------|
|                                        | (59%)            | (62%)               | (58%)            | (54%)            | (76%)            |
| Indigenous                             | 69/227<br>(30%)  | 205/1156<br>(18%)   | 105/383<br>(27%) | 52/379<br>(14%)  | 47/393<br>(12%)  |
| Mixed/Other                            | 25/227<br>(11%)  | 229/1156<br>(20%)   | 56/383<br>(15%)  | 124/379<br>(33%) | 49/393<br>(12%)  |
| Monthly Income,<br>median CAD          | \$800            | \$900               | \$1074           | \$770            | \$825            |
| Educational<br>Attainment <12<br>years | 171/228<br>(75%) | 529/1183<br>(45%)   | 178/391<br>(46%) | 170/397<br>(43%) | 181/394<br>(46%) |
| Educational<br>Attainment =12<br>years | 32/228<br>(14%)  | 277/1183<br>(23.4%) | 99/391<br>(25%)  | 90/397<br>(23%)  | 87/394<br>(22%)  |
| Educational<br>Attainment >12<br>years | 25/228<br>(11%)  | 377/1183<br>(32%)   | 114/391<br>(29%) | 137/397<br>(34%) | 126/394<br>(32%) |

**Figure S1. Age Distribution of Participants.**

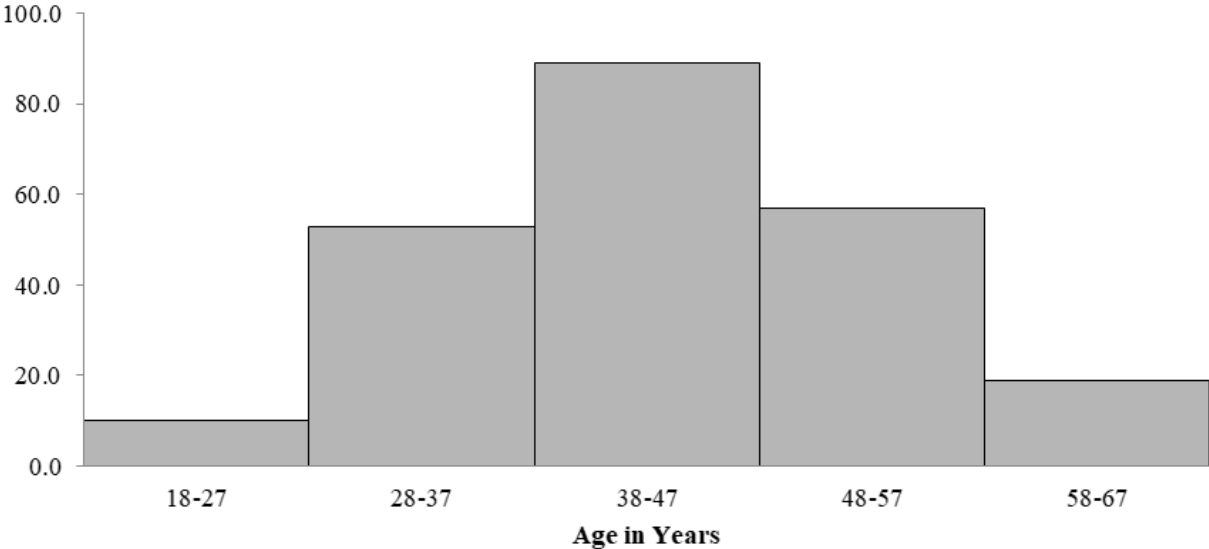

## SUPPLEMENTAL REFERENCES:

1. Chaudhry S, Jin L, Meltzer D. Use of a self-report-generated charlson comorbidity index for predicting mortality. *Med Care*. 2005;43:607-615.
2. Lewis M, Boyes K, McClanaghan D, Copas J. Downtown eastside demographic study of sro and social housing tenants. April 2008. Available Online at: [http://www.vancouveragreement.ca/wp-content/uploads/080600\\_DTES-Demographic-Study-Final.pdf](http://www.vancouveragreement.ca/wp-content/uploads/080600_DTES-Demographic-Study-Final.pdf)
3. Shannon K, Ishida T, Lai C, Tyndall MW. The impact of unregulated single room occupancy hotels on the health status of illicit drug users in vancouver. *International Journal of Drug Policy*. 2006;17:107-114.
4. Palepu A, Gadermann A, Hubley AM, Farrell S, Gogosis E, Aubry T, Hwang SW. Substance use and access to health care and addiction treatment among homeless and vulnerably housed persons in three canadian cities. *PLoS One*. 2013;8:e75133.
5. Hwang SW, Aubry T, Palepu A, Farrell S, Nisenbaum R, Hubley AM, Klodawsky F, Gogosis E, Hay E, Pidlubny S, Dowbor T, Chambers C. The health and housing in transition study: A longitudinal study of the health of homeless and vulnerably housed adults in three canadian cities. *Int J Public Health*. 2011;56:609-623.
